# Supplementary material for: High Voltage Electric Discharge for Recovery of Chlorogenic Acid from Tobacco Waste
Source: MDPI journal article supplement (doi:10.3390/su13084481), 2021-04-16
Supplement: s1 [file s1]

# SUPPLEMENTARY MATERIALS

**Table S1. Physical properties for reference extraction samples**

|    | Tobacco waste         | Scrap               |            |                      | Dust                |            |                      | Midrib              |            |                      |
|----|-----------------------|---------------------|------------|----------------------|---------------------|------------|----------------------|---------------------|------------|----------------------|
|    | Extraction parameters | Temperature changes | pH changes | Conductivity changes | Temperature changes | pH changes | Conductivity changes | Temperature changes | pH changes | Conductivity changes |
| C1 | 1/300 mL/g, 15 min    | 1.10                | 0.15       | 9.01                 | 0.50                | 0.21       | 5.47                 | 1.10                | -0.02      | 5.72                 |
| C2 | 1/300 mL/g, 30 min    | 2.20                | 0.01       | 14.02                | 0.60                | 0.13       | 7.89                 | 2.00                | 0.29       | 942                  |
| C3 | 1/300 mL/g, 45 min    | 2.90                | 0.15       | 16.08                | 1.80                | 0.21       | 9.69                 | 2.90                | 0.28       | 14.47                |
| C4 | 1/500 mL/g, 15 min    | 0.80                | 0.11       | 8.40                 | 0.60                | 0.38       | 7.78                 | 1.50                | 0.11       | 3.21                 |
| C5 | 1/500 mL/g, 30 min    | 1.30                | 0.14       | 7.11                 | 0.90                | 0.22       | 8.63                 | 1.90                | 0.14       | 5.72                 |
| C6 | 1/500 mL/g, 45 min    | 2.40                | 0.98       | 14.87                | 1.50                | 0.32       | 11.25                | 1.80                | 0.13       | 5.42                 |
| C7 | 1/700 mL/g, 15 min    | 0.70                | 0.25       | 21.22                | 1.20                | 0.15       | 8.59                 | 1.90                | 0.04       | 5.47                 |
| C8 | 1/700 mL/g, 30 min    | 0.90                | 0.47       | 25.01                | 1.20                | 0.37       | 11.22                | 2.50                | 0.33       | 14.21                |
| C9 | 1/700 mL/g, 45 min    | 2.10                | 0.71       | 26.00                | 2.50                | 0.47       | 16.5                 | 2.60                | -0.09      | 15.89                |

**Table S2. Analysis of variance (ANOVA) for the response surface quadratic models for physical properties of tobacco waste**

| Source                             | Sum of squares | df | Mean square | F-value | p-value |
|------------------------------------|----------------|----|-------------|---------|---------|
| <i>Scrap (Temperature changes)</i> |                |    |             |         |         |
| Model                              | 340.50         | 9  | 37.83       | 147.17  | <0.0001 |
| X <sub>1</sub>                     | 4.81           | 1  | 4.81        | 18.69   | 0.0035  |
| X <sub>2</sub>                     | 55.65          | 1  | 55.65       | 216.48  | <0.0001 |
| X <sub>3</sub>                     | 256.51         | 1  | 256.51      | 997.82  | <0.0001 |
| X <sub>1</sub> <sup>2</sup>        | 3.74           | 1  | 3.74        | 14.55   | 0.0066  |
| X <sub>2</sub> <sup>2</sup>        | 11.02          | 1  | 11.02       | 42.85   | 0.0003  |
| X <sub>3</sub> <sup>2</sup>        | 1.61           | 1  | 1.61        | 6.25    | 0.0410  |
| X <sub>1</sub> X <sub>2</sub>      | 0.81           | 1  | 0.81        | 3.15    | 0.1192  |
| X <sub>1</sub> X <sub>3</sub>      | 1.00           | 1  | 1.00        | 3.89    | 0.0892  |
| X <sub>2</sub> X <sub>3</sub>      | 3.80           | 1  | 3.80        | 14.79   | 0.0063  |
| Residual                           | 1.80           | 7  | 0.26        |         |         |
| Lack of fit                        | 0.37           | 3  | 0.12        | 0.34    | 0.7975  |
| Pure error                         | 1.43           | 4  | 0.36        |         |         |
| Cor total                          | 342.30         | 16 |             |         |         |
| <b>R<sup>2</sup>=0.9947</b>        |                |    |             |         |         |
| <i>Dust (Temperature changes)</i>  |                |    |             |         |         |
| Model                              | 391.69         | 9  | 43.52       | 10.99   | 0.0023  |

|                                     |                        |    |                        |        |         |
|-------------------------------------|------------------------|----|------------------------|--------|---------|
| X <sub>1</sub>                      | 22.44                  | 1  | 22.44                  | 5.67   | 0.0489  |
| X <sub>2</sub>                      | 29.26                  | 1  | 29.26                  | 7.39   | 0.0299  |
| X <sub>3</sub>                      | 291.61                 | 1  | 291.61                 | 73.61  | 0.0001  |
| X <sub>1</sub> <sup>2</sup>         | 11.95                  | 1  | 11.95                  | 3.02   | 0.3599  |
| X <sub>2</sub> <sup>2</sup>         | 0.28                   | 1  | 0.28                   | 0.072  | 0.1362  |
| X <sub>3</sub> <sup>2</sup>         | 18.75                  | 1  | 18.75                  | 4.73   | 0.9228  |
| X <sub>1</sub> X <sub>2</sub>       | 3.80                   | 1  | 3.80                   | 0.96   | 0.3599  |
| X <sub>1</sub> X <sub>3</sub>       | 11.22                  | 1  | 11.22                  | 2.83   | 0.1362  |
| X <sub>2</sub> X <sub>3</sub>       | 0.040                  | 1  | 0.040                  | 0.010  | 0.9228  |
| Residual                            | 27.73                  | 7  | 3.96                   |        |         |
| Lack of fit                         | 23.38                  | 3  | 7.79                   | 7.17   | 0.0436  |
| Pure error                          | 4.35                   | 4  | 1.09                   |        |         |
| Cor total                           | 419.42                 | 16 |                        |        |         |
| R <sup>2</sup> =0.9339              |                        |    |                        |        |         |
| <i>Midrib (Temperature changes)</i> |                        |    |                        |        |         |
| Model                               | 313.45                 | 9  | 34.83                  | 40.36  | <0.0001 |
| X <sub>1</sub>                      | 0.55                   | 1  | 0.55                   | 0.64   | 0.4504  |
| X <sub>2</sub>                      | 8.41                   | 1  | 8.41                   | 9.74   | 0.0168  |
| X <sub>3</sub>                      | 272.61                 | 1  | 272.61                 | 315.91 | <0.0001 |
| X <sub>1</sub> <sup>2</sup>         | 0.28                   | 1  | 0.28                   | 0.33   | 0.5837  |
| X <sub>2</sub> <sup>2</sup>         | 7.28                   | 1  | 7.28                   | 8.44   | 0.0228  |
| X <sub>3</sub> <sup>2</sup>         | 22.08                  | 1  | 22.08                  | 25.59  | 0.0015  |
| X <sub>1</sub> X <sub>2</sub>       | 0.30                   | 1  | 0.30                   | 0.35   | 0.5724  |
| X <sub>1</sub> X <sub>3</sub>       | 0.63                   | 1  | 0.63                   | 0.42   | 0.5389  |
| X <sub>2</sub> X <sub>3</sub>       | 0.42                   | 1  | 0.42                   | 0.49   | 0.5067  |
| Residual                            | 6.04                   | 7  | 0.86                   |        |         |
| Lack of fit                         | 5.19                   | 3  | 1.73                   | 8.16   | 0.0352  |
| Pure error                          | 0.85                   | 4  | 0.21                   |        |         |
| Cor total                           | 319.49                 | 16 |                        |        |         |
| R <sup>2</sup> =0.9811              |                        |    |                        |        |         |
| <i>Scrap (Z value)</i>              |                        |    |                        |        |         |
| Model                               | 0.71                   | 9  | 0                      | 3.84   | 0.0450  |
| X <sub>1</sub>                      | 0.36                   | 1  | 0.78                   | 17.58  | 0.0041  |
| X <sub>2</sub>                      | 1.268x10 <sup>-3</sup> | 1  | 0.36                   | 0.062  | 0.8104  |
| X <sub>3</sub>                      | 0.027                  | 1  | 1.268x10 <sup>-3</sup> | 1.33   | 0.2864  |
| X <sub>1</sub> <sup>2</sup>         | 0.17                   | 1  | 0.17                   | 8.40   | 0.0230  |
| X <sub>2</sub> <sup>2</sup>         | 0.035                  | 1  | 0.035                  | 1.70   | 0.2335  |
| X <sub>3</sub> <sup>2</sup>         | 0.034                  | 1  | 0.034                  | 1.66   | 0.2385  |
| X <sub>1</sub> X <sub>2</sub>       | 3.28                   | 1  | 3.28x10 <sup>-3</sup>  | 0.16   | 0.7006  |
| X <sub>1</sub> X <sub>3</sub>       | 0.077                  | 1  | 0.077                  | 3.77   | 0.0934  |
| X <sub>2</sub> X <sub>3</sub>       | 1.192x10 <sup>-4</sup> | 1  | 2.192x10 <sup>-4</sup> | 0.011  | 0.9204  |
| Residual                            | 0.14                   | 7  | 0.020                  |        |         |
| Lack of fit                         | 0.14                   | 3  | 0.046                  | 51.81  | 0.0012  |
| Pure error                          | 3.587x10 <sup>-3</sup> | 4  | 8.967x10 <sup>-4</sup> |        |         |
| Cor total                           | 0.85                   | 16 |                        |        |         |
| R <sup>2</sup> =0.8315              |                        |    |                        |        |         |
| <i>Dust (Z value)</i>               |                        |    |                        |        |         |
| Model                               | 0.47                   | 9  | 0.052                  | 3.72   | 0.0485  |
| X <sub>1</sub>                      | 0.11                   | 1  | 0.11                   | 8.15   | 0.0245  |
| X <sub>2</sub>                      | 3.77x10 <sup>-5</sup>  | 1  | 3.777x10 <sup>-3</sup> | 0      | 0.6184  |
| X <sub>3</sub>                      | 0.077                  | 1  | 0.077                  | 0.27   | 0.0513  |

|                               |                        |    |                         |                        |        |
|-------------------------------|------------------------|----|-------------------------|------------------------|--------|
| X <sub>1</sub> <sup>2</sup>   | 5.833x10 <sup>-6</sup> | 1  | 5.833x10 <sup>-6</sup>  | 5.51                   | 0.9842 |
| X <sub>2</sub> <sup>2</sup>   | 0.15                   | 1  | 0.15                    | 4.193x10 <sup>-4</sup> | 0.0139 |
| X <sub>3</sub> <sup>2</sup>   | 2.859x10 <sup>-3</sup> | 1  | 2.859x10 <sup>-3</sup>  | 10.61                  | 0.6640 |
| X <sub>1</sub> X <sub>2</sub> | 1.151x10 <sup>-5</sup> | 1  | 1.151x10 <sup>-5</sup>  | 0.21                   | 0.9779 |
| X <sub>1</sub> X <sub>3</sub> | 0.12                   | 1  | 0.12                    | 8.277x10 <sup>-4</sup> | 0.0218 |
| X <sub>2</sub> X <sub>3</sub> | 3.311x10 <sup>-3</sup> | 1  | 3.311x10 <sup>-3</sup>  | 8.62                   | 0.6406 |
| Residual                      | 0.097                  | 7  | 0.014                   |                        |        |
| Lack of fit                   | 0.089                  | 3  | 0.030                   | 14.56                  | 0.0128 |
| Pure error                    | 8.168x10 <sup>-3</sup> | 4  | 2.042x10 <sup>-3</sup>  |                        |        |
| Cor total                     | 0.56                   | 16 |                         |                        |        |
| <b>R<sup>2</sup>=0.8272</b>   |                        |    |                         |                        |        |
| <i>Midrib (Z value)</i>       |                        |    |                         |                        |        |
| Model                         | 1.03                   | 9  | 0.11                    | 10.63                  | 0.0026 |
| X <sub>1</sub>                | 0.30                   | 1  | 0.30                    | 27.57                  | 0.0012 |
| X <sub>2</sub>                | 0.19                   | 1  | 0.19                    | 17.59                  | 0.0041 |
| X <sub>3</sub>                | 0.16                   | 1  | 0.16                    | 14.41                  | 0.0067 |
| X <sub>1</sub> <sup>2</sup>   | 0.035                  | 1  | 0.035                   | 3.23                   | 0.1153 |
| X <sub>2</sub> <sup>2</sup>   | 0.11                   | 1  | 0.11                    | 10.04                  | 0.0157 |
| X <sub>3</sub> <sup>2</sup>   | 0.013                  | 1  | 0.013                   | 1.16                   | 0.3169 |
| X <sub>1</sub> X <sub>2</sub> | 1.31x10 <sup>-4</sup>  | 1  | 1.310x.10 <sup>-4</sup> | 0.012                  | 0.9154 |
| X <sub>1</sub> X <sub>3</sub> | 6.384x10 <sup>-3</sup> | 1  | 6.384x10 <sup>-3</sup>  | 0.59                   | 0.4674 |
| X <sub>2</sub> X <sub>3</sub> | 0.21                   | 1  | 0.21                    | 19.72                  | 0.0030 |
| Residual                      | 0.076                  | 7  | 0.011                   |                        |        |
| Lack of fit                   | 0.056                  | 3  | 0.019                   | 3.87                   | 0.1121 |
| Pure error                    | 0.019                  | 4  | 4.851x10 <sup>-3</sup>  |                        |        |
| Cor total                     | 1.11                   | 16 |                         |                        |        |
| <b>R<sup>2</sup>=0.9318</b>   |                        |    |                         |                        |        |

**Table S3.** Analysis of variance (ANOVA) for the response surface quadratic models for TPC tobacco waste HVED extracts

| Source                        | Sum of squares | df | Mean square | F-value                | p-value |
|-------------------------------|----------------|----|-------------|------------------------|---------|
| <i>Scrap (TPC)</i>            |                |    |             |                        |         |
| Model                         | 1049.63        | 9  | 116.63      | 4.64                   | 0.0278  |
| X <sub>1</sub>                | 808.64         | 1  | 808.64      | 32.15                  | 0.0008  |
| X <sub>2</sub>                | 43.80          | 1  | 43.80       | 1.74                   | 0.2285  |
| X <sub>3</sub>                | 33.87          | 1  | 33.87       | 1.35                   | 0.2839  |
| X <sub>1</sub> <sup>2</sup>   | 0.18           | 1  | 0.18        | 7.131x10 <sup>-3</sup> | 0.9351  |
| X <sub>2</sub> <sup>2</sup>   | 58.97          | 1  | 58.97       | 2.34                   | 0.1696  |
| X <sub>3</sub> <sup>2</sup>   | 66.04          | 1  | 66.04       | 2.63                   | 0.1492  |
| X <sub>1</sub> X <sub>2</sub> | 8.54           | 1  | 8.54        | 5.123x10 <sup>-3</sup> | 0.5783  |
| X <sub>1</sub> X <sub>3</sub> | 0.13           | 1  | 0.13        | 0.89                   | 0.9449  |
| X <sub>2</sub> X <sub>3</sub> | 22.50          | 1  | 22.50       | 7.131x10 <sup>-3</sup> | 0.3757  |

|                               |         |    |         |        |          |
|-------------------------------|---------|----|---------|--------|----------|
| Residual                      | 176.08  | 7  | 25.15   |        |          |
| Lack of fit                   | 120.41  | 3  | 40.14   | 2.88   | 0.1663   |
| Pure error                    | 55.68   | 4  | 13.92   |        |          |
| Cor total                     | 1225.71 | 16 |         |        |          |
| R <sup>2</sup> =0.8563        |         |    |         |        |          |
| <i>Dust (TPC)</i>             |         |    |         |        |          |
| Model                         | 3806.81 | 9  | 422.98  | 10.07  | 0.0030   |
| X <sub>1</sub>                | 2581.67 | 1  | 2581.67 | 61.44  | 0.0001   |
| X <sub>2</sub>                | 342.68  | 1  | 342.68  | 8.16   | 0.0245   |
| X <sub>3</sub>                | 224.83  | 1  | 224.83  | 5.35   | 0.0539   |
| X <sub>1</sub> <sup>2</sup>   | 14.75   | 1  | 14.75   | 0.35   | 0.5721   |
| X <sub>2</sub> <sup>2</sup>   | 7.06    | 1  | 7.06    | 0.17   | 0.6941   |
| X <sub>3</sub> <sup>2</sup>   | 107.43  | 1  | 107.43  | 2.56   | 0.1538   |
| X <sub>1</sub> X <sub>2</sub> | 313.02  | 1  | 313.02  | 7.45   | 0.0294   |
| X <sub>1</sub> X <sub>3</sub> | 163.71  | 1  | 163.71  | 3.90   | 0.0890   |
| X <sub>2</sub> X <sub>3</sub> | 53.40   | 1  | 53.40   | 1.27   | 0.2967   |
| Residual                      | 294.12  | 7  | 42.02   |        |          |
| Lack of fit                   | 73.18   | 3  | 24.39   | 0.44   | 0.7360   |
| Pure error                    | 220.94  | 4  | 55.24   |        |          |
| Cor total                     | 4100.93 | 16 |         |        |          |
| R <sup>2</sup> =0.9283        |         |    |         |        |          |
| <i>Midrib (TPC)</i>           |         |    |         |        |          |
| Model                         | 598.68  | 9  | 66.52   | 30.84  | < 0.0001 |
| X <sub>1</sub>                | 399.68  | 1  | 399.68  | 185.31 | < 0.0001 |
| X <sub>2</sub>                | 38.17   | 1  | 38.17   | 17.70  | 0.0040   |
| X <sub>3</sub>                | 49.87   | 1  | 49.87   | 23.12  | 0.0019   |
| X <sub>1</sub> <sup>2</sup>   | 2.89    | 1  | 2.89    | 1.34   | 0.2850   |
| X <sub>2</sub> <sup>2</sup>   | 3.19    | 1  | 3.19    | 1.48   | 0.2635   |
| X <sub>3</sub> <sup>2</sup>   | 3.24    | 1  | 3.24    | 1.50   | 0.2603   |
| X <sub>1</sub> X <sub>2</sub> | 39.22   | 1  | 39.22   | 18.19  | 0.0037   |
| X <sub>1</sub> X <sub>3</sub> | 4.53    | 1  | 4.53    | 2.10   | 0.1906   |
| X <sub>2</sub> X <sub>3</sub> | 58.19   | 1  | 58.19   | 26.98  | 0.0013   |
| Residual                      | 15.10   | 7  | 2.16    |        |          |
| Lack of fit                   | 8.94    | 3  | 2.98    | 1.93   | 0.2658   |
| Pure error                    | 6.16    | 4  | 1.54    |        |          |
| Cor total                     | 613.78  | 16 |         |        |          |
| R <sup>2</sup> =0.9811        |         |    |         |        |          |

**Table S4.** Analysis of variance (ANOVA) for the response surface quadratic models for CA

| Source                      | Sum of squares | df | Mean square | F-value | p-value |
|-----------------------------|----------------|----|-------------|---------|---------|
| <i>Scrap</i>                |                |    |             |         |         |
| Model                       | 3.87           | 9  | 0.43        | 3.99    | 0.0408  |
| X <sub>1</sub>              | 1.39           | 1  | 1.39        | 12.88   | 0.0089  |
| X <sub>2</sub>              | 1.74           | 1  | 1.74        | 16.15   | 0.0051  |
| X <sub>3</sub>              | 0.036          | 1  | 0.036       | 0.34    | 0.5789  |
| X <sub>1</sub> <sup>2</sup> | 0.22           | 1  | 0.22        | 2.00    | 0.2000  |
| X <sub>2</sub> <sup>2</sup> | 0.0011         | 1  | 0.0011      | 0.010   | 0.9219  |

|                               |                       |    |                       |        |         |
|-------------------------------|-----------------------|----|-----------------------|--------|---------|
| X <sub>3</sub> <sup>2</sup>   | 0.24                  | 1  | 0.24                  | 2.23   | 0.1790  |
| X <sub>1</sub> X <sub>2</sub> | 0.148225              | 1  | 0.15                  | 1.38   | 0.2790  |
| X <sub>1</sub> X <sub>3</sub> | 0.0676                | 1  | 0.068                 | 0.63   | 0.4541  |
| X <sub>2</sub> X <sub>3</sub> | 0                     | 1  | 0.000                 | 0.000  | 1.0000  |
| Residual                      | 0.75                  | 7  | 0.11                  |        |         |
| Lack of fit                   | 0.62                  | 3  | 0.21                  | 6.00   | 0.0581  |
| Pure error                    | 0.137                 | 4  | 0.034                 |        |         |
| Cor total                     | 4.62                  | 16 |                       |        |         |
| R <sup>2</sup> =0.8369        |                       |    |                       |        |         |
| <i>Dust</i>                   |                       |    |                       |        |         |
| Model                         | 1.28                  | 9  | 0.1426                | 14.33  | 0.001   |
| X <sub>1</sub>                | 0.0008                | 1  | 0.0008                | 0.0804 | 0.785   |
| X <sub>2</sub>                | 0.0018                | 1  | 0.0018                | 0.1809 | 0.6834  |
| X <sub>3</sub>                | 0.3120                | 1  | 0.3120                | 31.36  | 0.0008  |
| X <sub>1</sub> <sup>2</sup>   | 0.7252                | 1  | 0.7252                | 72.88  | <0.0001 |
| X <sub>2</sub> <sup>2</sup>   | 0.0178                | 1  | 0.0178                | 1.79   | 0.2230  |
| X <sub>3</sub> <sup>2</sup>   | 0.1946                | 1  | 0.1946                | 19.56  | 0.0031  |
| X <sub>1</sub> X <sub>2</sub> | 0.0001                | 11 | 0.0001                | 0.0101 | 0.9230  |
| X <sub>1</sub> X <sub>3</sub> | 0.0001                | 1  | 0.0001                | 0.0101 | 0.9230  |
| X <sub>2</sub> X <sub>3</sub> | 0.0025                | 1  | 0.0025                | 0.2513 | 0.6316  |
| Residual                      | 0.0697                | 7  | 0.0100                |        |         |
| Lack of fit                   | 0.0401                | 3  | 0.0134                | 1.80   | 0.2860  |
| Pure error                    | 0.0296                | 4  | 0.0074                |        |         |
| Cor total                     | 1.35                  | 16 |                       |        |         |
| R <sup>2</sup> =0.9485        |                       |    |                       |        |         |
| <i>Midrib</i>                 |                       |    |                       |        |         |
| Model                         | 1.08                  | 9  | 0.1195                | 4.57   | 0.0288  |
| X <sub>1</sub>                | 0.125                 | 1  | 0.1250                | 4.78   | 0.0650  |
| X <sub>2</sub>                | 0.320                 | 1  | 0.3200                | 12.25  | 0.0100  |
| X <sub>3</sub>                | 0.1404                | 1  | 0.1404                | 5.37   | 0.0535  |
| X <sub>1</sub> <sup>2</sup>   | 9.47x10 <sup>-6</sup> | 1  | 9.47x10 <sup>-6</sup> | 0.0004 | 0.9853  |
| X <sub>2</sub> <sup>2</sup>   | 0.0785                | 1  | 0.0785                | 3      | 0.1268  |
| X <sub>3</sub> <sup>2</sup>   | 0.0014                | 1  | 0.0014                | 0.0551 | 0.8211  |
| X <sub>1</sub> X <sub>2</sub> | 0.0961                | 1  | 0.0961                | 3.68   | 0.0967  |
| X <sub>1</sub> X <sub>3</sub> | 0.0009                | 1  | 0.0009                | 0.0344 | 0.8580  |
| X <sub>2</sub> X <sub>3</sub> | 0.3136                | 1  | 0.3136                | 12.00  | 0.0105  |
| Residual                      | 0.1829                | 7  | 0.0261                |        |         |
| Lack of fit                   | 0.0753                | 3  | 0.0251                | 0.9318 | 0.5032  |
| Pure error                    | 0.1077                | 4  | 0.0269                |        |         |
| Cor total                     | 1.26                  | 16 |                       |        |         |
| R <sup>2</sup> =0.8546        |                       |    |                       |        |         |
